# Supplementary material for: Radicals from tributyl phosphate decomposition: a combined electron paramagnetic resonance spectroscopic and computational chemistry investigation
Source: Royal Society of Chemistry journal article supplement (doi:10.1039/d3cp03584k), 2023-01-01
Supplement: d3cp03584k1.pdf [file d3cp03584k1.pdf]

## Supplementary Information for publication:

### **Radicals from tributyl phosphate decomposition: a combined electron paramagnetic resonance spectroscopy and computation chemistry**

Ilya S. Sosulin, Delaney H. Ryan, Aliaksandra Lisouskaya\*

Notre Dame Radiation Laboratory, University of Notre Dame, Notre Dame, IN 46556, USA

\*Corresponding Author: [alisousk@nd.edu](mailto:alisousk@nd.edu); phone (574) 631-5457

#### **Contents:**

- Calculated molecular geometries and energies for conformers of TBP R1-R4 radicals at the DFT(B3LYP)/L1a\_3 level of theory (**Table S1**) and .DFT(B3LYP)/gen level (**Table S2**).
- The HFC constants for alpha and beta-protons of radicals R1, R2 and R4 calculated at the DFT(B3LYP)/L1a\_3 level of theory as a function of dihedral angle  $\alpha\text{H-C-C-}\beta\text{H}$  (**Figures S1-S3**).

**Table S1.** Calculated molecular geometries and energies for conformers of TBP R1-R4 radicals at the DFT(B3LYP)/L1a\_3 level of theory

**Abbreviations:**

E –energy,a.u.

**R1-A**

\$molecule

mult=2

cartesian

set=L1a\_3

|    |             |             |             |
|----|-------------|-------------|-------------|
| 15 | 0.86899558  | -0.66531332 | 0.93664395  |
| 8  | 1.73501019  | -1.27760156 | 1.96894918  |
| 8  | 1.60785700  | -0.26651057 | -0.44737281 |
| 8  | -0.34474973 | -1.54654047 | 0.39838662  |
| 8  | 0.16344654  | 0.71256964  | 1.32513710  |
| 6  | 2.53875022  | -1.12753501 | -1.01488788 |
| 6  | 3.05698984  | -0.69271640 | -2.33471205 |
| 6  | 1.99797216  | -0.61326853 | -3.45265693 |
| 6  | 1.40795361  | -1.97076782 | -3.83452248 |
| 6  | -1.02964919 | -2.49097589 | 1.26836297  |
| 6  | -2.27833678 | -1.88676504 | 1.88852374  |
| 6  | -3.33459541 | -1.44506562 | 0.87356547  |
| 6  | -4.58555650 | -0.86450503 | 1.53383616  |
| 6  | 0.83090972  | 1.67699489  | 2.18872360  |

6 1.46181979 2.82573429 1.41581443  
6 0.49034625 3.82317046 0.76940925  
6 -0.26794950 3.30719026 -0.45647575  
1 3.09724323 -1.73933858 -0.31617107  
1 3.85168661 -1.38836754 -2.62508581  
1 3.53115963 0.29850065 -2.23529891  
1 2.46208377 -0.15207904 -4.33126501  
1 1.19703126 0.06256568 -3.13722018  
1 0.91717273 -2.44438147 -2.98000836  
1 2.18569588 -2.65411308 -4.19066340  
1 0.66661673 -1.86699810 -4.63159468  
1 -0.33002679 -2.83625707 2.03230479  
1 -1.28130352 -3.33085693 0.61708706  
1 -1.99383453 -1.04143352 2.52516844  
1 -2.70230299 -2.64707661 2.55782404  
1 -3.61373451 -2.30315140 0.24961049  
1 -2.89909113 -0.70352839 0.19730912  
1 -4.34099416 0.01516805 2.13721546  
1 -5.06398732 -1.59469483 2.19422257  
1 -5.32307121 -0.55900964 0.78687017  
1 1.57811689 1.14853732 2.78459131  
1 0.04801030 2.04117555 2.85821302  
1 2.14643591 2.42104617 0.66232259

1 2.08675542 3.36522399 2.13894891  
1 1.06452036 4.71042399 0.47990750  
1 -0.22497878 4.16512524 1.52811180  
1 -0.93043146 2.47698687 -0.20785927  
1 0.42584539 2.95355635 -1.22492474  
1 -0.87383150 4.10488207 -0.89634041

\$end

Energy = -1115.5914199011

### **R1-B**

\$molecule

mult=2

cartesian

set=L1a\_3

15 -0.49191168 -1.33461785 0.48407416  
8 -0.94279054 -2.66427278 0.95139648  
8 0.89371355 -1.31697150 -0.35288605  
8 -1.46534311 -0.55996705 -0.51476718  
8 -0.19686514 -0.24157577 1.60766164  
6 1.20334582 -2.33895464 -1.23868843  
6 2.27592766 -2.06452144 -2.22126735  
6 1.82906702 -1.38971860 -3.54362391  
6 1.27735316 0.02498076 -3.37221312  
6 -2.90970518 -0.73058748 -0.43554803

6 -3.59876358 0.37860310 0.34537753  
6 -3.62507828 1.76242417 -0.31875399  
6 -2.29035593 2.51216264 -0.33516997  
6 0.38995804 -0.62534325 2.88498153  
6 1.88705816 -0.36221496 2.95296327  
6 2.31525239 1.11100267 3.00821461  
6 2.16030867 1.89338960 1.70130950  
1 0.52297309 -3.17970104 -1.27215277  
1 2.75292685 -3.01967388 -2.47094796  
1 3.04272950 -1.44041564 -1.74568516  
1 1.07873752 -2.02498071 -4.02728817  
1 2.69495897 -1.36799004 -4.21614050  
1 0.37926181 0.03480147 -2.75080101  
1 1.01914109 0.46120216 -4.34157097  
1 2.01408405 0.68098848 -2.89816114  
1 -3.11686727 -1.70686440 0.00764054  
1 -3.24415596 -0.74131865 -1.47560640  
1 -3.15508493 0.44656965 1.34503614  
1 -4.63270708 0.04133874 0.49272727  
1 -4.36514148 2.37390260 0.20953521  
1 -4.00152580 1.65737893 -1.34407659  
1 -1.89402531 2.62549481 0.67820262  
1 -2.41794291 3.51353096 -0.75683456

1 -1.53563733 1.99025058 -0.92490104  
1 0.16905811 -1.67981496 3.06419207  
1 -0.14516544 -0.02831606 3.62717623  
1 2.38181897 -0.86968514 2.11775864  
1 2.23663199 -0.86214704 3.86532359  
1 3.36690012 1.14286870 3.31440578  
1 1.75631580 1.61412075 3.80738314  
1 1.11685477 1.97107090 1.39294410  
1 2.70645384 1.40706421 0.88766315  
1 2.55823598 2.90650703 1.81111711

\$end

Energy = -1115.5870894833

### **R1-C**

\$molecule

mult=2

cartesian

set=L1a\_3

15 0.37375806 -0.62722979 1.26849160  
8 0.67939843 -1.00234500 2.66092134  
8 1.34479775 -1.20788833 0.11166871  
8 -1.04731981 -1.14939357 0.77084861  
8 0.43166466 0.94259613 0.93665204  
6 2.72547902 -1.19666116 0.26988153

6 3.47907957 -1.78876006 -0.86054494  
6 3.35430265 -3.32567968 -0.98041597  
6 4.14148398 -3.88541559 -2.16509238  
6 -1.53996252 -0.90945483 -0.57275263  
6 -2.99811629 -1.32507310 -0.63164742  
6 -3.92946764 -0.48381423 0.24364090  
6 -5.39221736 -0.91685993 0.13774079  
6 -0.00904528 1.90398189 1.93472331  
6 0.46773045 3.28336304 1.52140345  
6 -0.12631221 3.79094764 0.20570435  
6 0.34772154 5.19975222 -0.15339134  
1 3.07544005 -1.23063244 1.29634782  
1 4.53537550 -1.52340852 -0.73820274  
1 3.14252737 -1.33134539 -1.79974423  
1 2.29670756 -3.59030249 -1.07737441  
1 3.70469633 -3.78489351 -0.04973225  
1 3.78863600 -3.46204567 -3.11069623  
1 4.04106491 -4.97228390 -2.22967208  
1 5.20785544 -3.65470821 -2.07789132  
1 -0.93564946 -1.49642407 -1.26835953  
1 -1.42035286 0.15179409 -0.81046374  
1 -3.07402298 -2.38180756 -0.35208369  
1 -3.31191497 -1.25606913 -1.68096773

1 -3.83845161 0.57079395 -0.04473349  
1 -3.60339776 -0.54962168 1.28587185  
1 -5.51874428 -1.95752370 0.45115506  
1 -5.75924543 -0.83431581 -0.89013269  
1 -6.03538708 -0.30003891 0.77087073  
1 0.40249450 1.61377435 2.90336511  
1 -1.10221315 1.86662956 1.99122137  
1 1.56178569 3.27316035 1.45957200  
1 0.20706325 3.97198757 2.33511072  
1 -1.22101708 3.78047733 0.27734379  
1 0.13737993 3.09996652 -0.60065479  
1 1.43592921 5.23394593 -0.26303376  
1 0.07134797 5.92234051 0.62080810  
1 -0.09088206 5.53848518 -1.09575581

\$end

Energy = -1115.5947843785

## R1-D

\$molecule

mult=2

cartesian

set=L1a\_3

15 -0.27226408 -0.76763957 1.31621787  
8 -0.19149172 -1.46910684 2.61653410



8 1.13292719 -0.55101647 0.54331729  
8 -1.13789369 -1.46919863 0.17473316  
8 -0.85591832 0.71734796 1.34253256  
6 2.12808209 -1.51856908 0.57930933  
6 3.09442294 -1.47343271 -0.54135086  
6 2.52818900 -1.94333978 -1.90190466  
6 3.55971382 -1.85581247 -3.02660916  
6 -2.34267526 -2.21779086 0.50480077  
6 -3.61594683 -1.41200395 0.29304110  
6 -3.99903862 -1.11872954 -1.16417039  
6 -3.11745746 -0.09657080 -1.88679085  
6 -0.57953532 1.60793410 2.46094958  
6 0.63196854 2.48827622 2.20322485  
6 0.49752062 3.40284537 0.98405051  
6 1.72354856 4.29171710 0.77239201  
1 1.93470438 -2.38761856 1.19568660  
1 3.95422239 -2.09782488 -0.27340038  
1 3.46992206 -0.44750194 -0.65452237  
1 1.65334269 -1.33479386 -2.15035063  
1 2.17239995 -2.97462149 -1.80216502  
1 3.13862514 -2.19296904 -3.97773660  
1 4.43554554 -2.47640879 -2.81243232  
1 3.90911758 -0.82776646 -3.16365713

1 -2.26410358 -2.56151649 1.53849170  
1 -2.31745116 -3.08951785 -0.15342038  
1 -3.55015793 -0.47808147 0.86220215  
1 -4.42172734 -1.99635478 0.75536676  
1 -5.03413970 -0.75913515 -1.17223832  
1 -4.00597627 -2.06126088 -1.72614012  
1 -3.51255880 0.11196541 -2.88544714  
1 -2.09037803 -0.44763939 -1.99580209  
1 -3.08303208 0.84901109 -1.33743020  
1 -0.45304658 1.00781353 3.36448139  
1 -1.48617789 2.20842353 2.56216033  
1 1.52327542 1.85940358 2.10361770  
1 0.78204604 3.09438812 3.10654807  
1 -0.39461796 4.03051419 1.10153680  
1 0.32813196 2.79360201 0.09121587  
1 2.62480486 3.69000147 0.62024310  
1 1.90135849 4.93913063 1.63692127  
1 1.60171940 4.93384742 -0.10400626

\$end

Energy = -1115.5914871891

**R2-A**

\$molecule

mult=2

cartesian

set=L1a\_3

|    |             |             |             |
|----|-------------|-------------|-------------|
| 15 | -0.00280956 | -1.18757245 | 0.86683035  |
| 8  | -0.23496170 | -2.35938668 | 1.74552507  |
| 8  | 1.51767924  | -0.92555106 | 0.43761234  |
| 8  | -0.76280311 | -1.20213053 | -0.54118357 |
| 8  | -0.43676920 | 0.23432730  | 1.46348147  |
| 6  | 2.40526133  | -2.07671088 | 0.15012185  |
| 6  | 2.20633171  | -2.62179096 | -1.21236575 |
| 6  | 2.43714859  | -1.81755505 | -2.44771416 |
| 6  | 3.66875502  | -0.90232790 | -2.41752286 |
| 6  | -2.10459640 | -1.74756601 | -0.65555305 |
| 6  | -3.16273031 | -0.65688957 | -0.61897393 |
| 6  | -3.05150291 | 0.36377113  | -1.75334627 |
| 6  | -4.14152244 | 1.43462690  | -1.69743581 |
| 6  | -0.20598396 | 0.54787753  | 2.86438050  |
| 6  | 1.00285314  | 1.44890145  | 3.07426501  |
| 6  | 0.85015101  | 2.90528401  | 2.61402174  |
| 6  | 0.81955444  | 3.11928103  | 1.09833212  |
| 1  | 2.23519884  | -2.83392139 | 0.91616766  |
| 1  | 3.40025921  | -1.64719805 | 0.28486406  |
| 1  | 1.69926091  | -3.57638326 | -1.30529287 |
| 1  | 1.54706528  | -1.19447634 | -2.63697275 |

1 2.50249886 -2.49704653 -3.30450987  
1 3.58841355 -0.14396893 -1.63513199  
1 3.77735579 -0.37971683 -3.37123009  
1 4.58463795 -1.47412497 -2.24270752  
1 -2.25800570 -2.48132426 0.13881218  
1 -2.11405310 -2.26784400 -1.61644088  
1 -3.12123639 -0.14591929 0.34909203  
1 -4.13983080 -1.15602096 -0.66456365  
1 -3.10242054 -0.16122307 -2.71543660  
1 -2.06722097 0.83987452 -1.71567973  
1 -4.09303041 1.99784049 -0.76040130  
1 -5.14021631 0.99148084 -1.76443008  
1 -4.03937347 2.14890343 -2.51886112  
1 -0.09838820 -0.38733899 3.41868295  
1 -1.12200809 1.04107637 3.19949300  
1 1.87717337 0.99146371 2.59855971  
1 1.20106500 1.44357969 4.15371689  
1 1.68410268 3.47900255 3.03397659  
1 -0.05815092 3.32669883 3.06324460  
1 -0.04933643 2.64727676 0.63756292  
1 1.71044674 2.69558296 0.62521042  
1 0.79173825 4.18713848 0.86180040

\$end

Energy = -1115.5875717222

## R2-B

\$molecule

mult=2

cartesian

set=L1a\_3

|    |             |             |             |
|----|-------------|-------------|-------------|
| 15 | 0.72834859  | -0.26729407 | 1.15743910  |
| 8  | 1.46040369  | -0.81618537 | 2.32480305  |
| 8  | 1.63633352  | 0.30320703  | -0.03212921 |
| 8  | -0.24351254 | -1.28546532 | 0.39560722  |
| 8  | -0.24996536 | 0.96465070  | 1.45817326  |
| 6  | 2.90596782  | -0.38077807 | -0.37428310 |
| 6  | 2.70134985  | -1.56203385 | -1.24145655 |
| 6  | 2.22235595  | -1.42633121 | -2.64338121 |
| 6  | 2.39338623  | -2.69448476 | -3.48380777 |
| 6  | -0.97028747 | -2.30685041 | 1.13175151  |
| 6  | -2.41786749 | -1.92573501 | 1.40841179  |
| 6  | -3.35587959 | -1.89738176 | 0.19351012  |
| 6  | -3.15261190 | -0.72464505 | -0.76942878 |
| 6  | 0.12668417  | 1.99083828  | 2.41666042  |
| 6  | 0.70161048  | 3.23858652  | 1.76114803  |
| 6  | -0.28369657 | 4.09734762  | 0.95571122  |
| 6  | -0.71815089 | 3.51403329  | -0.39164313 |

1 3.40933925 -0.63839170 0.55819566  
1 3.46717453 0.40405544 -0.88780384  
1 2.74916829 -2.54888795 -0.79126960  
1 2.73505941 -0.58082815 -3.12358977  
1 1.15781696 -1.13918599 -2.63622075  
1 3.44628322 -2.97934004 -3.56017902  
1 2.00847009 -2.55088437 -4.49652011  
1 1.85289654 -3.53436988 -3.03781229  
1 -0.43585868 -2.51016688 2.06244888  
1 -0.91830097 -3.19847666 0.50167046  
1 -2.44401172 -0.96229478 1.92923823  
1 -2.79311377 -2.67054397 2.12190888  
1 -4.38655384 -1.87255859 0.56500960  
1 -3.25829734 -2.84402727 -0.35299170  
1 -3.90523855 -0.74432389 -1.56332841  
1 -2.16668476 -0.74610671 -1.23545428  
1 -3.24565463 0.23103854 -0.24522918  
1 0.83706252 1.56027670 3.12626333  
1 -0.79633791 2.22531182 2.95281893  
1 1.55580833 2.95698365 1.13586907  
1 1.10712050 3.84672718 2.57996961  
1 0.18518120 5.07241779 0.78154231  
1 -1.16853603 4.29763677 1.57319630

1 -1.26851051 2.57986335 -0.27296975

1 0.14954017 3.30359794 -1.02407220

1 -1.35829080 4.22099907 -0.92777635

\$end

Energy = -1115.5862374967

**R3-A**

\$molecule

mult=2

cartesian

set=L1a\_3

15 -0.09899602 -0.73480125 1.29314756

8 -0.07004844 -1.49075512 2.56809062

8 1.31620965 -0.51960429 0.57556008

8 -0.97980343 -1.36743843 0.11732892

8 -0.66976014 0.75769424 1.37536827

6 2.32924030 -1.55876341 0.60690752

6 2.29005828 -2.42422985 -0.64493520

6 2.51891072 -1.68587965 -1.91826391

6 2.75831927 -2.42271039 -3.18822881

6 -2.26037346 -1.99328539 0.40644021

6 -3.44355747 -1.09248526 0.08206804

6 -3.71223729 -0.83703331 -1.40760564

6 -2.70650049 0.07677006 -2.11316580

6 -0.37096235 1.60558339 2.51764638  
6 0.79770013 2.53748604 2.24143173  
6 0.57192001 3.49914797 1.07303668  
6 1.75560507 4.43893745 0.84122445  
1 2.19515699 -2.15942437 1.50904655  
1 3.27760760 -1.02248469 0.67573564  
1 1.32484618 -2.95839516 -0.67528169  
1 3.04853302 -3.21255146 -0.52343082  
1 2.27355057 -0.63031139 -1.95666277  
1 3.06682477 -1.75468806 -3.99578530  
1 1.85195618 -2.94913542 -3.53281628  
1 3.52897823 -3.19523528 -3.07063190  
1 -2.27298853 -2.29372580 1.45672480  
1 -2.27879370 -2.89620359 -0.20903317  
1 -3.32802455 -0.14180886 0.61383908  
1 -4.32393973 -1.58329783 0.51642313  
1 -4.71145221 -0.39597908 -1.49711448  
1 -3.76348756 -1.80075908 -1.93009181  
1 -1.70661473 -0.35881556 -2.13803700  
1 -2.62967493 1.04158038 -1.60288238  
1 -3.01973921 0.26838956 -3.14379448  
1 -0.18237083 0.97352313 3.38827905  
1 -1.28901759 2.17191863 2.69111445



1 1.70098399 1.94303360 2.06664787  
1 0.97592063 3.10872433 3.16224076  
1 -0.33327259 4.08942316 1.26268337  
1 0.37765887 2.92309683 0.16345749  
1 2.66695284 3.87652431 0.61592051  
1 1.95689455 5.05307705 1.72472625  
1 1.56778740 5.11489185 0.00267203

\$end

Energy = -1115.5894232857

### **R3-B**

\$molecule

mult=2

cartesian

set=L1a\_3

15 -0.42847533 -1.32589893 0.61272474  
8 -1.12094393 -2.40443859 1.35737988  
8 1.13436182 -1.54526109 0.34374421  
8 -0.97981722 -1.02342763 -0.85905013  
8 -0.45300854 0.12239298 1.29204413  
6 1.65145107 -2.85760071 0.00702983  
6 1.89257089 -3.00285155 -1.50117779  
6 2.89413462 -2.05220527 -2.06506258  
6 2.50561689 -0.76685337 -2.70449663

6 -2.40551651 -1.06237340 -1.14015114  
6 -3.02560684 0.32512487 -1.11471330  
6 -2.44112615 1.29369555 -2.14484747  
6 -3.10649549 2.66994312 -2.10925700  
6 -0.36911516 0.26874829 2.73626942  
6 1.06308457 0.47590983 3.20615409  
6 1.78425091 1.68473397 2.59709928  
6 1.17377604 3.03892439 2.96536536  
1 0.95936703 -3.62228067 0.36939892  
1 2.59074138 -2.94469289 0.55653182  
1 0.93277776 -2.90140380 -2.01876183  
1 2.22834494 -4.03965276 -1.64863925  
1 3.94206974 -2.22654110 -1.83665396  
1 1.60280613 -0.87884588 -3.31516424  
1 3.30467263 -0.37229706 -3.33884099  
1 2.27321003 0.00854322 -1.95703210  
1 -2.88976550 -1.73094261 -0.42492460  
1 -2.48119009 -1.50529853 -2.13602777  
1 -2.92802922 0.74643943 -0.10831167  
1 -4.10144526 0.19816246 -1.29469026  
1 -2.54827897 0.86055726 -3.14714881  
1 -1.36645573 1.40158236 -1.97051496  
1 -4.17998884 2.59971903 -2.31148914

1 -2.67131603 3.34092819 -2.85470869  
1 -2.98578496 3.14079251 -1.12876837  
1 -0.81259290 -0.61186548 3.20638277  
1 -0.99604816 1.13265600 2.96213184  
1 1.63709585 -0.43284082 2.99971774  
1 1.02626607 0.57773986 4.29899973  
1 1.80976578 1.57722344 1.50854618  
1 2.82761377 1.66029537 2.92977329  
1 1.13029554 3.17412825 4.05110790  
1 0.15807743 3.15047871 2.57621405  
1 1.76864993 3.85885303 2.55381751

\$end

Energy = -1115.5902114015

**R4-A**

\$molecule

mult=2

cartesian

set=L1a\_3

15 1.08046594 0.56300692 -0.94720920  
8 2.06841366 0.85805978 -2.01241169  
8 1.19754020 1.45048894 0.37958087  
8 -0.45779721 0.74671743 -1.34951525  
8 1.09597547 -0.92407172 -0.35875400

6 1.54050898 2.85869172 0.30085946  
6 0.32448004 3.76726698 0.41140664  
6 -0.36752103 3.78574028 1.78185493  
6 -1.15317862 2.57052099 2.12602165  
6 -0.92494467 0.39221668 -2.67992598  
6 -1.52218991 -1.00495115 -2.71854581  
6 -2.73690842 -1.19450927 -1.80783675  
6 -3.32805705 -2.60214223 -1.89234974  
6 2.35779834 -1.59191172 -0.07805542  
6 2.66609159 -1.64922007 1.41136852  
6 1.80785652 -2.61242161 2.24308667  
6 0.34660305 -2.19773174 2.43492711  
1 2.07752860 3.03806332 -0.63348344  
1 2.22828422 3.02927408 1.13279986  
1 -0.39746027 3.50494835 -0.36888702  
1 0.67608635 4.78036353 0.18056948  
1 -1.03203395 4.66727557 1.80895253  
1 0.37846678 3.98553520 2.56560201  
1 -1.50509754 2.41977941 3.13966925  
1 -1.46746620 1.86882409 1.36463551  
1 -0.09546055 0.49264507 -3.38327311  
1 -1.67930170 1.14528142 -2.91958177  
1 -0.74730198 -1.73678178 -2.46580292

1 -1.80655185 -1.20229834 -3.76072741  
1 -3.50488577 -0.45778309 -2.07457945  
1 -2.45087561 -0.97870081 -0.77418317  
1 -4.19336676 -2.70971815 -1.23283310  
1 -2.59199111 -3.35708546 -1.59935717  
1 -3.65446223 -2.83749516 -2.91033439  
1 3.15437448 -1.08181442 -0.62473360  
1 2.24870001 -2.59669302 -0.49408875  
1 2.60965419 -0.63726949 1.82672371  
1 3.71575238 -1.95906565 1.49339878  
1 2.27770048 -2.71433377 3.22787193  
1 1.85042062 -3.60989168 1.78743810  
1 -0.19876802 -2.17902876 1.49023687  
1 0.27715602 -1.19694480 2.87156134  
1 -0.16423746 -2.89283583 3.10790392

\$end

Energy = -1115.5811693710

#### **R4-B**

\$molecule

mult=2

cartesian

set=L1a\_3

15 -0.49558081 -0.33827408 1.20712368

8 -0.95053491 -1.32330673 2.21693475  
8 1.08778311 -0.20619040 1.02588545  
8 -0.97842707 -0.58573538 -0.30031753  
8 -0.95909795 1.17462538 1.44348562  
6 1.96079292 -1.34835935 1.22836150  
6 2.35454415 -2.02954885 -0.07421021  
6 3.26826315 -1.21712733 -1.00186730  
6 2.62653459 -0.08121927 -1.71711188  
6 -2.38510549 -0.83492377 -0.55909787  
6 -2.56427868 -1.12321813 -2.03798265  
6 -1.87277635 -2.39954073 -2.52167480  
6 -2.12179694 -2.68192261 -4.00378840  
6 -1.07261825 1.71952594 2.78646271  
6 0.13397854 2.55513837 3.18978663  
6 0.29509567 3.90357721 2.47401728  
6 0.72563642 3.82536301 1.00674528  
1 1.46436221 -2.05219983 1.89992552  
1 2.84030672 -0.94337539 1.73482873  
1 1.45057768 -2.33598233 -0.61061486  
1 2.87300610 -2.95362344 0.20956367  
1 3.70333557 -1.91024953 -1.74162354  
1 4.13816382 -0.85750545 -0.42915993  
1 3.23069624 0.58515911 -2.32158844

1 1.55735990 0.07839920 -1.68793766  
1 -2.95385502 0.05238156 -0.26619159  
1 -2.70778773 -1.68071991 0.05472728  
1 -2.20673919 -0.26163437 -2.61318970  
1 -3.64354736 -1.19546537 -2.22324855  
1 -2.22227396 -3.24837589 -1.92166616  
1 -0.79677448 -2.31788319 -2.34208351  
1 -3.18953392 -2.80203644 -4.21262502  
1 -1.61599939 -3.59666415 -4.32403555  
1 -1.75334198 -1.86297429 -4.62926888  
1 -1.22724453 0.89347925 3.48431446  
1 -1.97905823 2.32978893 2.76648663  
1 1.04296538 1.95473462 3.07305239  
1 0.02509642 2.74141830 4.26591992  
1 1.03686404 4.49025786 3.02769181  
1 -0.64637853 4.46200632 2.55266168  
1 0.89469966 4.82805897 0.60292051  
1 -0.02463802 3.33263374 0.38678249  
1 1.65732649 3.26150845 0.90160603

\$end

Energy = -1115.5820467601

**R4-C**

\$molecule

mult=2

cartesian

set=L1a\_3

|    |             |             |             |
|----|-------------|-------------|-------------|
| 15 | 0.53191693  | 0.22897901  | 1.35377213  |
| 8  | 0.92709540  | 0.49813030  | 2.75702630  |
| 8  | 1.71653463  | 0.24049086  | 0.27824068  |
| 8  | -0.16257359 | -1.18621238 | 1.07761471  |
| 8  | -0.52033624 | 1.24938908  | 0.71155009  |
| 6  | 3.03181715  | -0.27899768 | 0.61235422  |
| 6  | 3.18574427  | -1.73400806 | 0.19685493  |
| 6  | 3.01920768  | -1.97978974 | -1.31094886 |
| 6  | 4.08744919  | -1.37493139 | -2.15048037 |
| 6  | -1.10672107 | -1.74655979 | 2.03057571  |
| 6  | -2.54603480 | -1.50170203 | 1.60803738  |
| 6  | -2.92147403 | -2.12877715 | 0.26385060  |
| 6  | -4.38109028 | -1.88180325 | -0.11898685 |
| 6  | -0.43702558 | 2.67334701  | 0.99656366  |
| 6  | 0.21056196  | 3.46356923  | -0.13174075 |
| 6  | -0.61455641 | 3.60828731  | -1.41800949 |
| 6  | -0.76072226 | 2.33523015  | -2.25589814 |
| 1  | 3.20068671  | -0.15290911 | 1.68407634  |
| 1  | 3.72883664  | 0.36047367  | 0.06735787  |
| 1  | 2.46779898  | -2.34543172 | 0.75130962  |



1 4.18516875 -2.05784105 0.51436706  
1 2.03643940 -1.62370621 -1.63686042  
1 2.99753377 -3.07212492 -1.47095763  
1 3.89844034 -1.09299591 -3.17912630  
1 5.11268415 -1.33453201 -1.79760029  
1 -0.90253963 -1.32976141 3.01932413  
1 -0.88230270 -2.81572204 2.05167646  
1 -2.73650369 -0.42329906 1.58361883  
1 -3.18685807 -1.91229325 2.39967529  
1 -2.73092527 -3.20850764 0.30504035  
1 -2.26544295 -1.73123601 -0.51623676  
1 -4.59144205 -0.81096376 -0.20060480  
1 -5.06533303 -2.29621108 0.62822185  
1 -4.62256934 -2.34105734 -1.08132317  
1 0.10794180 2.80988760 1.93345792  
1 -1.47106257 2.99149222 1.15141185  
1 1.19041097 3.02928693 -0.35799648  
1 0.40374767 4.46524846 0.27307714  
1 -0.14287165 4.38261362 -2.03351934  
1 -1.60865101 3.99570645 -1.16102444  
1 0.21884422 1.92171160 -2.51374833  
1 -1.28941526 2.54896215 -3.18961925  
1 -1.31240914 1.55856832 -1.72437344

\$end

Energy = -1115.5833581370

**Table S2.** Calculated molecular geometries and of TBP R1-R4 radicals at the DFT(B3LYP)/gen level of theory

**R1**

|   |              |              |              |
|---|--------------|--------------|--------------|
| P | -0.560804482 | -3.571541779 | -1.973524703 |
| O | 0.121320696  | -2.755537557 | -3.167282413 |
| O | 0.004074032  | -3.37658923  | -0.614802647 |
| O | -0.473812159 | -5.08378378  | -2.54932795  |
| O | -2.109229563 | -3.225098643 | -2.168793888 |
| C | 0.341859664  | -1.317931178 | -3.033489503 |
| H | -0.634100602 | -0.820982399 | -3.021637335 |
| H | 0.847682209  | -1.128565402 | -2.081550057 |
| C | 1.183245148  | -0.86097793  | -4.212975818 |
| H | 0.661062834  | -1.118729824 | -5.143441908 |
| H | 2.12933203   | -1.417564476 | -4.210268678 |
| C | 1.462831281  | 0.647854285  | -4.170530576 |
| H | 0.5104679    | 1.19533097   | -4.159773249 |
| H | 1.973437173  | 0.898055648  | -3.230554942 |
| C | 2.31134937   | 1.121806298  | -5.354834949 |
| H | 1.810620524  | 0.914224738  | -6.308223063 |

H 2.496104907 2.200442852 -5.301342589  
H 3.284029712 0.61547615 -5.372089676  
C 0.536204475 -5.964731266 -2.152241991  
H 1.328063424 -5.535178297 -1.545762177  
C 0.74975896 -7.119196581 -3.064951438  
H 1.174289325 -6.775309912 -4.027099885  
C 1.677237432 -8.181986591 -2.454514991  
H 2.635415969 -7.71537986 -2.188304013  
C 1.926717316 -9.359534163 -3.401055017  
H 2.393891007 -9.024737068 -4.33524077  
H 2.589815543 -10.10127127 -2.942178197  
H 0.988210384 -9.864373797 -3.660637627  
C -3.094998905 -3.708996607 -1.204948633  
H -3.150493388 -4.798425895 -1.296771439  
H -2.750702741 -3.453118282 -0.197799009  
C -4.433110698 -3.06113983 -1.518569862  
H -4.718605038 -3.316090965 -2.547818345  
H -5.178035839 -3.531203041 -0.86179559  
C -4.456319232 -1.539848246 -1.324228663  
H -3.69730595 -1.08068447 -1.969478194  
H -4.167762649 -1.305496234 -0.289971364

C -5.827383969 -0.92756893 -1.626989374  
H -5.817720613 0.158345928 -1.48049865  
H -6.127368241 -1.122103931 -2.664043985  
H -6.602190837 -1.346664544 -0.973180834  
H 1.23915625 -8.545412624 -1.516019594  
H -0.222879098 -7.567784636 -3.315417547

## **R2**

P -0.321187267 -3.464955523 -2.086493979  
O 0.032856465 -2.652593355 -3.423060023  
O 0.472013493 -3.11431374 -0.878645703  
O -0.218233228 -4.987665976 -2.581184511  
O -1.907011837 -3.256363536 -1.977681564  
C 0.219873676 -1.208584509 -3.370393951  
H -0.745250487 -0.743867756 -3.13964681  
H 0.924562918 -0.973752315 -2.566393731  
C 0.742946402 -0.752136284 -4.722172994  
H 0.029828725 -1.0545969 -5.500026833  
H 1.686081117 -1.273646121 -4.931308261  
C 0.961114106 0.766291276 -4.775289383  
H 0.015349796 1.278780024 -4.551974574

|   |              |              |              |
|---|--------------|--------------|--------------|
| H | 1.66588499   | 1.061632575  | -3.98596693  |
| C | 1.488833166  | 1.237589895  | -6.134168083 |
| H | 0.788468324  | 0.984942847  | -6.939458394 |
| H | 1.635423437  | 2.32335772   | -6.146143489 |
| H | 2.450979459  | 0.76678601   | -6.369626905 |
| C | 1.100889508  | -5.621570226 | -2.679345632 |
| H | 1.713554843  | -4.998906304 | -3.350508192 |
| H | 1.571091629  | -5.61604878  | -1.69011164  |
| C | 0.925006833  | -7.000034866 | -3.198159435 |
| H | 0.290733002  | -7.12327618  | -4.074321924 |
| C | 1.795758831  | -8.13291649  | -2.762391655 |
| H | 2.76682198   | -8.091105215 | -3.290575996 |
| C | 1.166213734  | -9.511811163 | -3.010784142 |
| H | 0.937157991  | -9.652276186 | -4.073666825 |
| H | 1.847634858  | -10.31301545 | -2.705185997 |
| H | 0.232581493  | -9.625198231 | -2.448674225 |
| C | -2.626108027 | -3.744428751 | -0.806298878 |
| H | -2.601307231 | -4.838931785 | -0.823409139 |
| H | -2.109691882 | -3.391860391 | 0.092547417  |
| C | -4.054094407 | -3.227563493 | -0.865839497 |
| H | -4.520126525 | -3.578138929 | -1.796415455 |

H -4.603102458 -3.704559205 -0.042165044  
C -4.17602742 -1.702574045 -0.756071717  
H -3.609979948 -1.234776148 -1.570955826  
H -3.704531416 -1.370985607 0.1797302  
C -5.629961101 -1.222165279 -0.797572366  
H -5.689728115 -0.130929337 -0.717106286  
H -6.116864825 -1.515072025 -1.735925477  
H -6.213230643 -1.650949578 0.026712044  
H 2.045375422 -8.019074402 -1.697444359

### **R3**

P -0.369765578 -3.515741611 -2.066930637  
O 0.040019273 -2.698983537 -3.38418743  
O 0.392117805 -3.192725071 -0.831848955  
O -0.279833276 -5.034512995 -2.575355394  
O -1.953681511 -3.280352496 -2.003843349  
C 0.240551465 -1.257382728 -3.312585004  
H -0.725633149 -0.784339355 -3.104508081  
H 0.924864046 -1.038018829 -2.48694565  
C 0.806529367 -0.792631403 -4.64404241  
H 0.110386892 -1.07430605 -5.444729404

|   |              |              |              |
|---|--------------|--------------|--------------|
| H | 1.74731977   | -1.325381631 | -4.834472285 |
| C | 1.048351767  | 0.722912964  | -4.670284044 |
| H | 0.105086207  | 1.246629729  | -4.462962031 |
| H | 1.737523034  | 0.996331968  | -3.859569948 |
| C | 1.61688541   | 1.205354207  | -6.008643943 |
| H | 0.932993297  | 0.97554695   | -6.834662897 |
| H | 1.78047231   | 2.288727848  | -6.000822175 |
| H | 2.577217301  | 0.7228687    | -6.227262791 |
| C | 1.01309483   | -5.698190156 | -2.649846569 |
| H | 1.60035119   | -5.224098126 | -3.443943636 |
| H | 1.53585123   | -5.569016788 | -1.697798674 |
| C | 0.768726843  | -7.171297579 | -2.954370085 |
| H | 0.133719723  | -7.23048809  | -3.8579168   |
| H | 0.177325326  | -7.614607729 | -2.141626929 |
| C | 2.045889346  | -7.926797776 | -3.144632886 |
| H | 2.851540316  | -7.437283621 | -3.689678011 |
| C | 2.11632022   | -9.403512023 | -2.94231551  |
| H | 1.647903955  | -9.959704076 | -3.774999271 |
| H | 3.152194719  | -9.753905752 | -2.872604687 |
| H | 1.586325061  | -9.712809324 | -2.03117111  |
| C | -2.716368072 | -3.760457077 | -0.856643924 |

H -2.72311438 -4.854900643 -0.88738115  
H -2.212470689 -3.434170503 0.059016453  
C -4.126549875 -3.200743187 -0.945066979  
H -4.578821155 -3.525385552 -1.8916908  
H -4.71003904 -3.671867475 -0.141990039  
C -4.206577325 -1.674369499 -0.817405678  
H -3.607168772 -1.21281858 -1.61176074  
H -3.748921119 -1.369053683 0.134064893  
C -5.644390837 -1.150756522 -0.887661608  
H -5.674211117 -0.059373528 -0.793709184  
H -6.116331368 -1.416912117 -1.841496005  
H -6.26010155 -1.572775326 -0.083736713

#### **R4**

P -0.39813538 -3.495275332 -2.036433268  
O -0.007428289 -2.706319729 -3.376223192  
O 0.378559082 -3.143483986 -0.818505703  
O -0.310118843 -5.02463281 -2.512395479  
O -1.981842201 -3.262367435 -1.958561776  
C 0.19060996 -1.26316157 -3.340311327  
H -0.776167226 -0.787243187 -3.141729658



H 0.87629013 -1.022139085 -2.52188632  
C 0.753020397 -0.830719571 -4.684123732  
H 0.056818976 -1.135660712 -5.476196728  
H 1.695421129 -1.364973647 -4.862022049  
C 0.989363766 0.684491511 -4.750400581  
H 0.044274181 1.210109541 -4.556629173  
H 1.677811922 0.98177162 -3.94750493  
C 1.555676666 1.133365696 -6.101312113  
H 0.872420314 0.879132462 -6.920672385  
H 1.715175762 2.21717594 -6.122323691  
H 2.517773867 0.64889906 -6.30743221  
C 0.983606402 -5.68906942 -2.57809234  
H 1.574593019 -5.218370857 -3.371716093  
C 0.740860502 -7.160476999 -2.870301954  
H 0.179913832 -7.25021887 -3.809164959  
C 2.057477661 -7.950315454 -2.974542481  
H 2.695498158 -7.46942627 -3.740897287  
C 1.852348714 -9.389876303 -3.309620877  
H 1.038887462 -9.694459673 -3.96238708  
H 2.604235215 -10.13128123 -3.05830633  
C -2.729368631 -3.724808897 -0.794249804

H -2.736368717 -4.81958101 -0.808452666  
H -2.213504585 -3.384820412 0.109705372  
C -4.140503236 -3.165948241 -0.87235233  
H -4.604992775 -3.503663846 -1.808431585  
H -4.713714533 -3.625479464 -0.055278586  
C -4.21835923 -1.637891182 -0.7651145  
H -3.628728538 -1.187898733 -1.573284118  
H -3.748651629 -1.319591164 0.176176562  
C -5.656679839 -1.114381165 -0.824683585  
H -5.684797721 -0.021764038 -0.745720666  
H -6.14066865 -1.393602313 -1.768692636  
H -6.262448333 -1.524660576 -0.007247577  
H 2.622233317 -7.861124858 -2.035439704  
H 0.113345172 -7.584542774 -2.077261206  
H 1.50120902 -5.54894357 -1.623708894

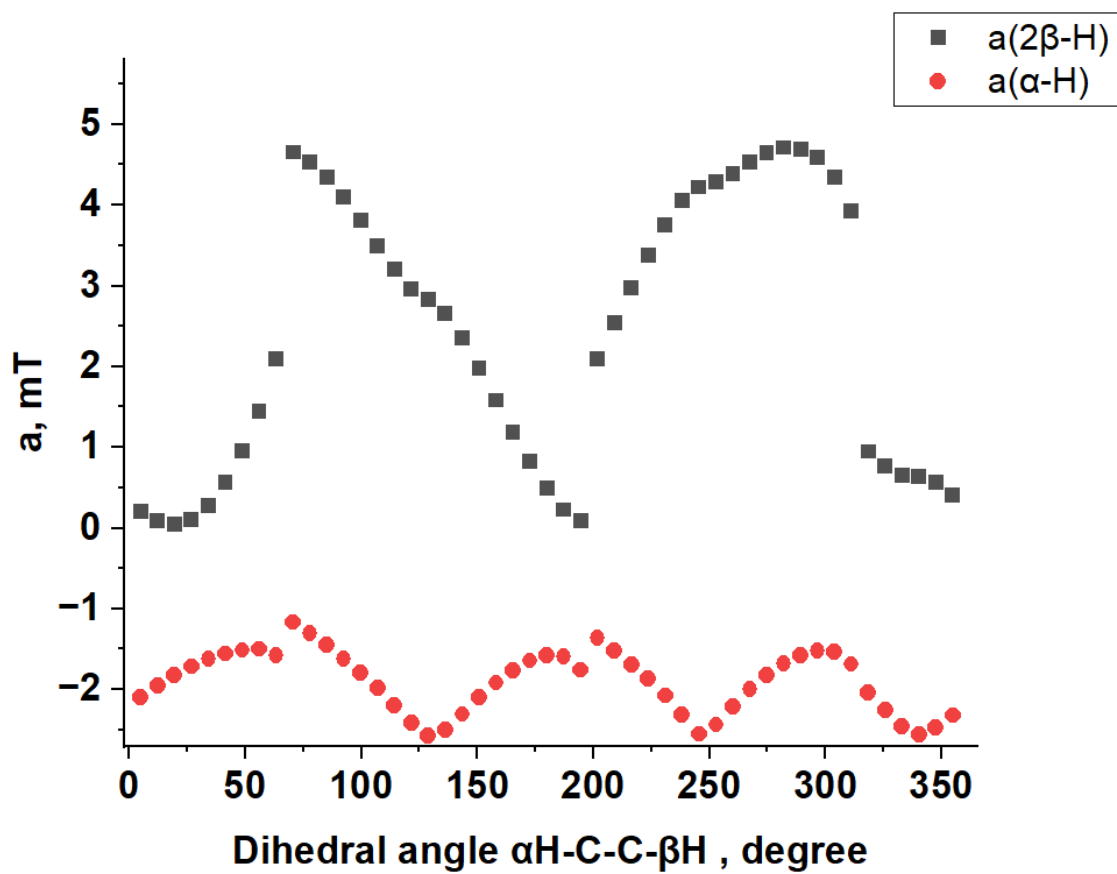

**Figure S1.** The HFC constants for alpha and beta-protons of radical R1 calculated at the DFT(B3LYP)/L1a\_3 level of theory as a function of dihedral angle  $\alpha\text{H-C-C-}\beta\text{H}$ .

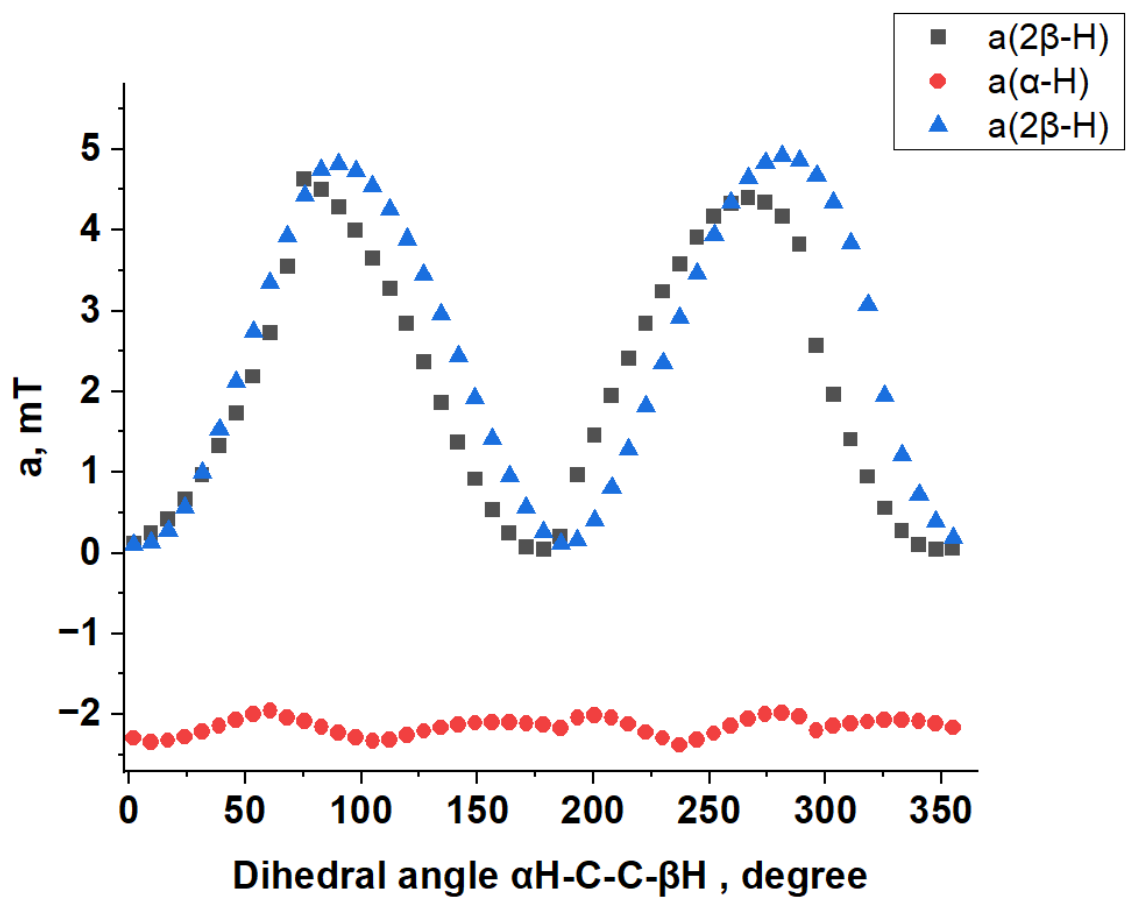

**Figure S2.** The HFC constants for alpha and beta-protons of radical R2 calculated at the DFT(B3LYP)/L1a\_3 level of theory as a function of dihedral angle  $\alpha\text{H-C-C-}\beta\text{H}$ .

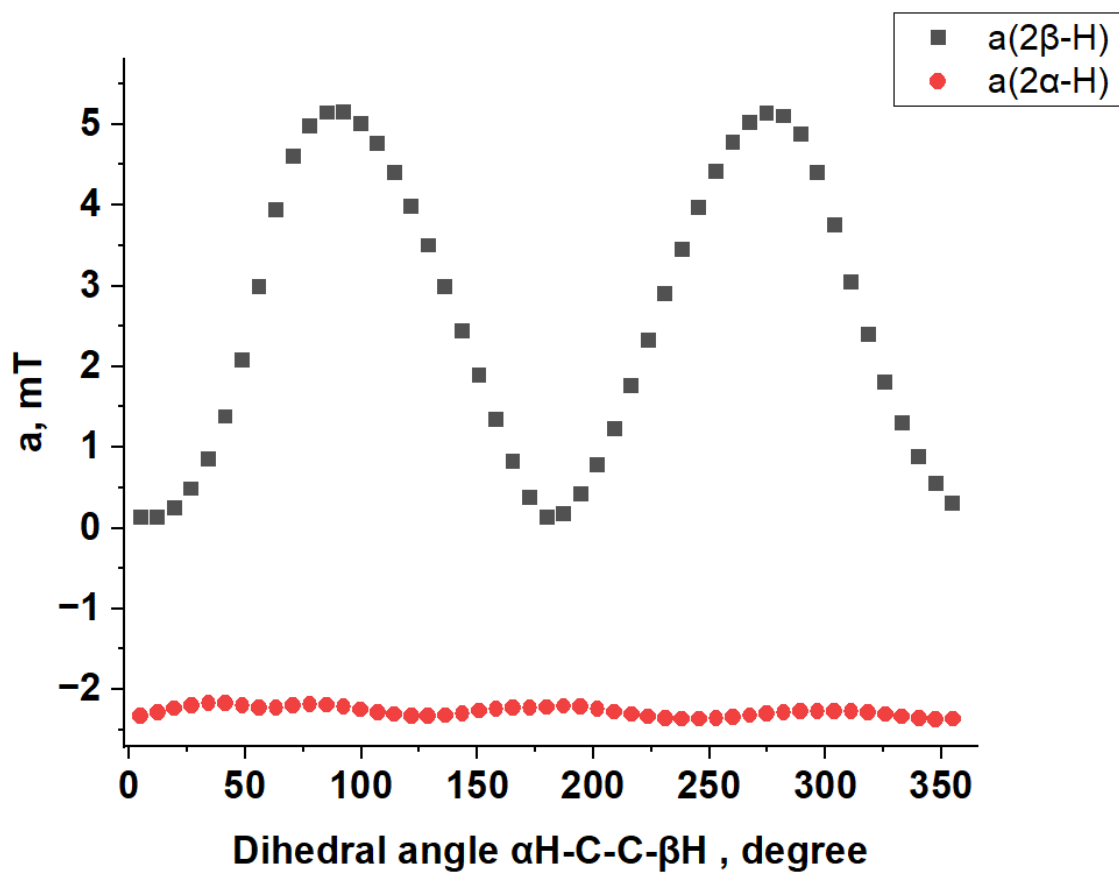

**Figure S3.** The HFC constants for alpha and beta-protons of radical R4 calculated at the DFT(B3LYP)/L1a\_3 level of theory as a function of dihedral angle  $\alpha\text{H-C-C-}\beta\text{H}$ .
